# Supplementary material for: The Effect of Nurses’ Perceptions of Mobbing on Burnout and Organizational Trust: The Moderating Role of Public Leadership Roles
Source: Research Square preprint supplement (doi:10.21203/rs.3.rs-7049123/v1), 2025-07-31
Supplement: Supplementary file 1 [file 3daaaa2abc237c357d0e9362.docx]

**
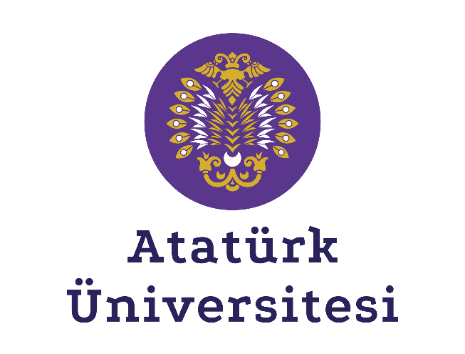

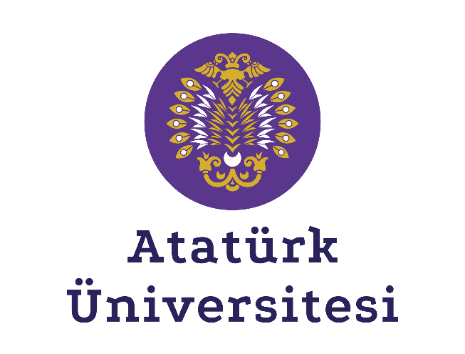
**

**THE EFFECT OF NURSES’ PERCEPTIONS OF MOBBING ON BURNOUT AND ORGANIZATIONAL TRUST: THE MODERATING ROLE OF PUBLIC LEADERSHIP ROLES**

This survey is conducted solely for scientific purposes.

In order to ensure the validity of the survey results, please answer the questions sincerely and accurately. Please do not write your name on the survey forms.

This survey has received ethical approval from the Atatürk University Social and Human Sciences Ethics Committee with the official letter numbered E.88656144-000-2400387415

We would like to thank you in advance for your interest and support.

***Asst. Prof. Dr. Adnan KARATAŞ***

| **Your Gender** | Woman  ( ) | Man  ( ) | |
| --- | --- | --- | --- |
| **Your Employment Status** | Civil servant  ( ) | Contract employee  ( ) | |
| **Your Age** | 18-25  ( ) | 26-35  ( ) | 36-45  ( ) | | 46-55  ( ) | 56 and older  ( ) |
| **Your Professional Experience** | 0-5 year  ( ) | 6-10 year  ( ) | 11-15 year  ( ) | | 16-20 year  ( ) | 21 year and above  ( ) |
| **Your Education Level** | High school  ( ) | Associate’s degree  ( ) | Bachelor  ( ) | | Master's degree  ( ) | PhD  ( ) |

| **NO** | **Copenhagen Burnout Inventory** | **Never** | **Rarely** | **Sometimes** | **Often** | **Always** |
| --- | --- | --- | --- | --- | --- | --- |
| **1** | Do you often feel that you do not get the recognition you deserve for the effort you put into caring for patients? | ① | ② | ③ | ④ | ⑤ |
| **2** | Do you feel burned out because of the work you do? | ① | ② | ③ | ④ | ⑤ |
| **3** | Does working with patients drain your energy? | ① | ② | ③ | ④ | ⑤ |
| **4** | Does your job emotionally exhaust you? | ① | ② | ③ | ④ | ⑤ |
| **5** | Do you find it difficult to take care of patients? | ① | ② | ③ | ④ | ⑤ |
| **6** | Does your work overwhelm you? | ① | ② | ③ | ④ | ⑤ |
| **7** | Do you find working with patients to be wearing? | ① | ② | ③ | ④ | ⑤ |
| **8** | Do you feel that every hour you work is tiring for you? | ① | ② | ③ | ④ | ⑤ |
| **9** | How often do you feel worn out? | ① | ② | ③ | ④ | ⑤ |
| **10** | Do you feel you have enough energy to spend time with your family and friends outside of work? | ① | ② | ③ | ④ | ⑤ |
| **11** | Do you ever wonder how much longer you can continue working with patients? | ① | ② | ③ | ④ | ⑤ |
| **12** | When you wake up in the morning, do you feel exhausted at the thought of “Another workday…”? | ① | ② | ③ | ④ | ⑤ |
| **13** | How often do you feel physically exhausted? | ① | ② | ③ | ④ | ⑤ |
| **14** | How often do you feel emotionally exhausted? | ① | ② | ③ | ④ | ⑤ |
| **15** | How often do you feel vulnerable and defenseless against illnesses? | ① | ② | ③ | ④ | ⑤ |
| **16** | Do you feel burned out at the end of a workday? | ① | ② | ③ | ④ | ⑤ |
| **17** | How often do you think, “I can’t take it anymore”? | ① | ② | ③ | ④ | ⑤ |
| **18** | Do you feel fed up with working with patients? | ① | ② | ③ | ④ | ⑤ |
| **19** | How often do you feel tired? | ① | ② | ③ | ④ | ⑤ |
| **NO** | **Workplace Bullying Scale** | **Strongly Disagree** | **Disagree** | **Neither Agree Nor Disagree** | **Agree** | **Strongly Agree** |
| **1** | I am treated in a humiliating, degrading, and dishonoring way in front of others. | ① | ② | ③ | ④ | ⑤ |
| **2** | I am blamed for issues that are not my responsibility. | ① | ② | ③ | ④ | ⑤ |
| **3** | I am held solely responsible for the outcomes of tasks done collectively. | ① | ② | ③ | ④ | ⑤ |
| **4** | My honesty and reliability are questioned. | ① | ② | ③ | ④ | ⑤ |
| **5** | I am verbally threatened and reprimanded. | ① | ② | ③ | ④ | ⑤ |
| **6** | My performance is constantly evaluated negatively. | ① | ② | ③ | ④ | ⑤ |
| **7** | False statements are made about me. | ① | ② | ③ | ④ | ⑤ |
| **8** | My work and its results are constantly criticized for faults. | ① | ② | ③ | ④ | ⑤ |
| **9** | My professional competence is questioned in every task I do. | ① | ② | ③ | ④ | ⑤ |
| **10** | Unjustified written complaints are made about me. | ① | ② | ③ | ④ | ⑤ |
| **11** | My decisions and suggestions are criticized and rejected. | ① | ② | ③ | ④ | ⑤ |
| **12** | Tasks under my responsibility are taken away and given to people in lower positions. | ① | ② | ③ | ④ | ⑤ |
| **13** | I am not given the opportunity to show myself; my freedom of expression is restricted. | ① | ② | ③ | ④ | ⑤ |
| **14** | I am not informed about organized social gatherings. | ① | ② | ③ | ④ | ⑤ |
| **15** | My requests for meetings or conversations are ignored; I am isolated. | ① | ② | ③ | ④ | ⑤ |
| **16** | I am ignored in my environment and treated as if I do not exist. | ① | ② | ③ | ④ | ⑤ |
| **17** | I am frequently interrupted while speaking. | ① | ② | ③ | ④ | ⑤ |
| **18** | My performance is evaluated as lower than it actually is. | ① | ② | ③ | ④ | ⑤ |
| **19** | I am pressured to resign or to change my position. | ① | ② | ③ | ④ | ⑤ |
| **20** | Information, documents, and materials necessary for my work are withheld from me. | ① | ② | ③ | ④ | ⑤ |
| **21** | The work I do is seen as worthless and insignificant, and it is belittled. | ① | ② | ③ | ④ | ⑤ |
| **22** | When I enter the room, my colleagues stop their conversations and go silent. | ① | ② | ③ | ④ | ⑤ |
| **23** | My areas of responsibility are changed without consulting me. | ① | ② | ③ | ④ | ⑤ |
| **24** | I am given tasks that are outside my area of expertise. | ① | ② | ③ | ④ | ⑤ |
| **25** | My physical disability is mocked. | ① | ② | ③ | ④ | ⑤ |
| **26** | I am assigned tasks that are below or above my capacity. | ① | ② | ③ | ④ | ⑤ |
| **27** | I am forced to do tasks that exceed my physical strength. | ① | ② | ③ | ④ | ⑤ |

| **NO** | **Organizational Trust Scale** | **Strongly Disagree** | **Disagree** | **Neither Agree Nor Disagree** | **Agree** | **Strongly Agree** |
| --- | --- | --- | --- | --- | --- | --- |
| **1** | I trust in the work skills of my colleagues. | ① | ② | ③ | ④ | ⑤ |
| **2** | My colleagues are sincere and honest in what they say and do. | ① | ② | ③ | ④ | ⑤ |
| **3** | My colleagues are self-sacrificing; I do not hesitate to ask for help when I need it. | ① | ② | ③ | ④ | ⑤ |
| **4** | I can easily share any work-related thoughts with my colleagues. | ① | ② | ③ | ④ | ⑤ |
| **5** | I trust that my colleagues will keep their promises to me. | ① | ② | ③ | ④ | ⑤ |
| **6** | My colleagues would not harm me for their own benefit. | ① | ② | ③ | ④ | ⑤ |
| **7** | Overall, my colleagues are very trustworthy. | ① | ② | ③ | ④ | ⑤ |
| **8** | My manager has the knowledge to supervise and improve the work I do. | ① | ② | ③ | ④ | ⑤ |
| **9** | My manager is ready to help when I need it. | ① | ② | ③ | ④ | ⑤ |
| **10** | I trust my manager not to share the information I provide with anyone else. | ① | ② | ③ | ④ | ⑤ |
| **11** | I can discuss any thoughts with my manager, knowing they won’t be used against me. | ① | ② | ③ | ④ | ⑤ |
| **12** | I fully trust that my superior will keep their promises to me. | ① | ② | ③ | ④ | ⑤ |
| **13** | I have full confidence that the right decisions will be made regarding the future of our institution. | ① | ② | ③ | ④ | ⑤ |
| **14** | In this institution, everything is conducted transparently and in accordance with the law; there are no hidden practices. | ① | ② | ③ | ④ | ⑤ |
| **15** | The institution provides fair compensation for our employee rights. | ① | ② | ③ | ④ | ⑤ |
| **16** | The institution supports its employees in every aspect. | ① | ② | ③ | ④ | ⑤ |
| **17** | I do not hesitate to make suggestions or express my opinions about institutional policies. | ① | ② | ③ | ④ | ⑤ |

| **NO** | **Public Leadership Roles Scale** | **Strongly Disagree** | **Disagree** | **Neither Agree Nor Disagree** | **Agree** | **Strongly Agree** |
| --- | --- | --- | --- | --- | --- | --- |
| **1** | My manager encourages me and my colleagues to explain the work we do to institutional stakeholders (citizens, students, etc.). | ① | ② | ③ | ④ | ⑤ |
| **2** | My manager encourages us to provide information to our stakeholders about how we work. | ① | ② | ③ | ④ | ⑤ |
| **3** | My manager enables us to have opportunities to explain our work to institutional stakeholders. | ① | ② | ③ | ④ | ⑤ |
| **4** | My manager emphasizes the importance of answering citizens' questions. | ① | ② | ③ | ④ | ⑤ |
| **5** | My manager strives for our unit to openly and honestly share information with other units. | ① | ② | ③ | ④ | ⑤ |
| **6** | My manager encourages us to inform stakeholders about the firm decisions made by the institution. | ① | ② | ③ | ④ | ⑤ |
| **7** | My manager stresses the importance of following laws to me and my colleagues. | ① | ② | ③ | ④ | ⑤ |
| **8** | My manager enables me and my colleagues to correctly follow government rules and regulations. | ① | ② | ③ | ④ | ⑤ |
| **9** | My manager advises me and my colleagues to properly implement government policies. | ① | ② | ③ | ④ | ⑤ |
| **10** | My manager ensures that we correctly follow rules and procedures. | ① | ② | ③ | ④ | ⑤ |
| **11** | My manager encourages me and my colleagues to support political decisions even if stakeholders react negatively. | ① | ② | ③ | ④ | ⑤ |
| **12** | My manager advises me and my colleagues not to damage our relationships with political leaders, despite various risks. | ① | ② | ③ | ④ | ⑤ |
| **13** | My manager encourages me and my colleagues to implement political decisions even if it requires extra responsibilities. | ① | ② | ③ | ④ | ⑤ |
| **14** | My manager encourages me and my colleagues to defend political decisions even if mistakes occur. | ① | ② | ③ | ④ | ⑤ |
| **15** | My manager encourages me and my colleagues to support political decisions even if there are adverse aspects. | ① | ② | ③ | ④ | ⑤ |
| **16** | My manager encourages me and my colleagues to establish many connections with other organizations. | ① | ② | ③ | ④ | ⑤ |
| **17** | My manager encourages me and my colleagues to expend high energy in developing new connections. | ① | ② | ③ | ④ | ⑤ |
| **18** | My manager advises me and my colleagues to regularly work with people within our own network. | ① | ② | ③ | ④ | ⑤ |
| **19** | My manager encourages me and my colleagues to establish relationships with units outside our own department. | ① | ② | ③ | ④ | ⑤ |
| **20** | My manager encourages me and my colleagues to introduce our network to other people. | ① | ② | ③ | ④ | ⑤ |
| **21** | My manager advises me and my colleagues to act as “bridge/link pins” between different institutions. | ① | ② | ③ | ④ | ⑤ |
